# Supplementary material for: Bariatric/Metabolic Surgery Induces Noticeable Changes of Microbiota and Their Secreting Extracellular Vesicle Composition in the Gut
Source: Springer Nature journal article supplement (doi:10.1007/s11695-019-03852-1), 2019-05-25
Supplement: MOESM2 [file 16750728]

Supplementary table. Preoperative clinical findings

|  | RY (n=10) | Sleeve (n=10) | Sham (n=3) | p-value |
| --- | --- | --- | --- | --- |
| Weight (g)  after HFD for 6 months | 839.8±89.7 | 837.9±122.9 | 832.3±60.1 | 0.909 |
| Average diet | 25 g/day | | | | |
| Random glucose (mg/dL) | 103.4±24.9 | 106.1±21.7 | 92±3.6 | 0.148 |

* Sham: sham operation; Sleeve: sleeve gastrectomy; RY: Roux-en-Y gastric bypass; HFD: high fat diet
